# Supplementary material for: Role of coherence and delocalization in photo-induced electron transfer at organic interfaces
Source: PubMed Central journal article supplement (PMC5015064; doi:10.1038/srep32914), 2016-09-08
Supplement: srep32914-s1.pdf [file srep32914-s1.pdf]

## Supplementary Information to

# Role of coherence and delocalization in photo-induced electron transfer at organic interfaces

V. Abramavicius<sup>1,2</sup>, V. Prancėvičius<sup>2</sup>, A. Melianas<sup>3</sup>, O. Inganäs<sup>3</sup>,

V. Gulbinas<sup>2</sup>, D. Abramavicius<sup>1</sup>

*1- Vilnius University, Faculty of Physics, Department of Theoretical Physics, Saulėtekio 9, LT-10222  
Vilnius*

*2- Center for Physical Sciences and Technology, Savanoriu 231, LT-02300 Vilnius, Lithuania*

*3- Biomolecular and organic electronics, Department of Physics, Chemistry and Biology (IFM),  
Linköping University, SE-581 83 Linköping, Sweden*

### Determination of the charge separation distance along the direction of the applied electric field

Fig. 1s shows the experimentally determined kinetic of the charge carrier drift distance. The initial part of the transient (0-3 ns) was determined by the TREFISH technique, whereas the latter part of the transient (3-10000 ns) was determined by a transient photocurrent measurement with a high load (integrated photocurrent). The photo-induced drop of the electric field was determined from the second harmonic intensity as described in [1s]:

$$\Delta F(t)/F = (I(t)/I_0)^{1/2} - 1 \quad (1s)$$

where  $I(t)$  and  $I_0$  are the second harmonic intensities with and without the excitation pulse respectively, and  $F$  is the internal electric field created by the applied voltage and the built-in field of the OSC, the latter was assumed to be 1V. Charge carrier drift distance  $l(t)$  was determined from electric field dynamics by numerically solving eq. (2s) as described in [2s]:

$$\Delta F(t)_{norm} = \frac{2}{D^2} \int_0^t [D - l(t')] \frac{dl(t')}{dt'} dt' \quad (2s)$$

where  $DF(t)_{norm}$  is the electric field drop normalized to the voltage drop at full extraction ( $\sim 10^4$  ns in case of Fig. 1s) and  $D$  is the sample thickness. Charge carrier separation distance along the direction of the applied electric field equals to the sum of electron and hole drift distances, thus full extraction corresponds to  $D/2 = 35$ nm in Fig. 1s. The initial part of the transient in Fig. 1s is mainly dominated by electron motion, whereas the latter part of the transient is dominated by the motion of holes.

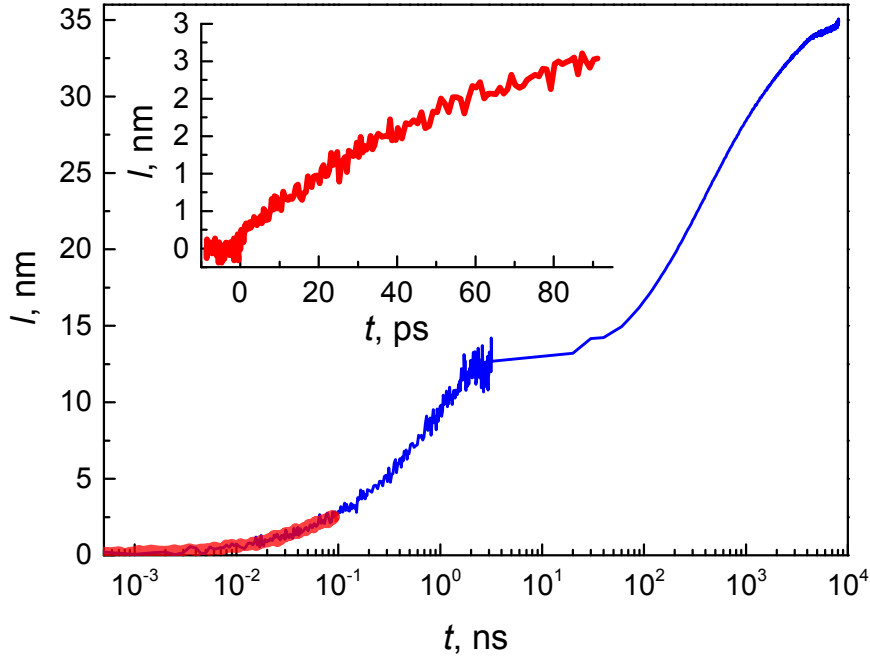

**Figure 1s.** Time dependence of the average carrier drift distance at an electric field of  $F = 5.7 \times 10^5$  V/cm. Inset shows the initial 100 ps of the kinetic which were measured with better accuracy for comparison with simulations.

## Transient absorption spectroscopy

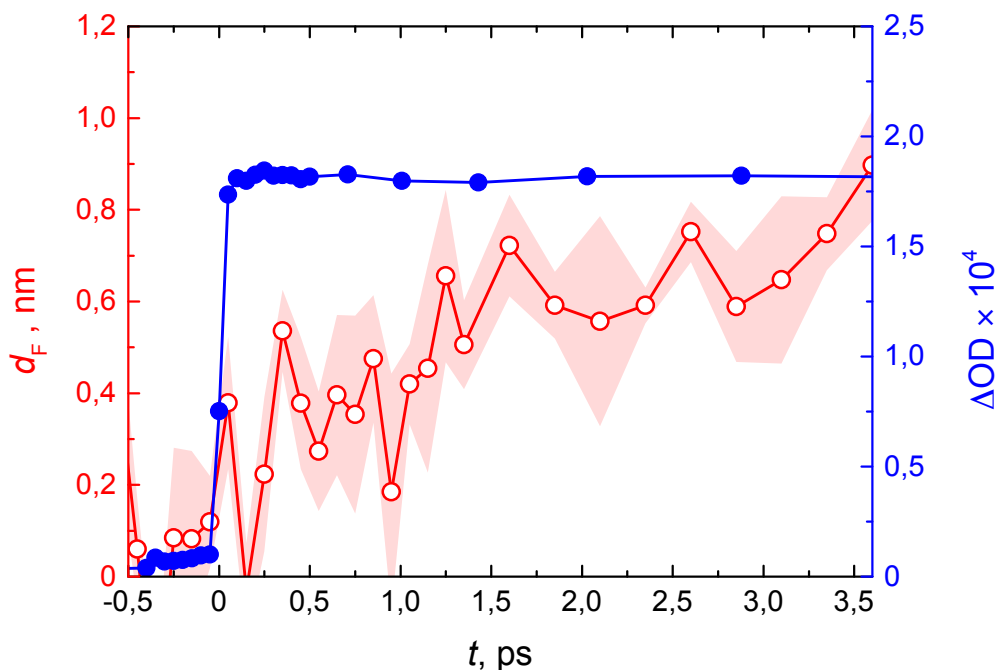

**Figure 2s.** Time dependence of the charge separation distance  $d_F$  as in Figure 2 of the main text (red) and a transient absorption (TA) kinetic (blue), indicating ultrafast  $<100$ fs photo-induced charge transfer with no signatures of delayed charge transfer due to exciton diffusion. Thus, the experimental EFISH data directly monitors the motion of the photo-induced electron away from the donor/acceptor interface. In TA the sample was excited at a pump fluence of  $2.2 \times 10^{12}$  photons/cm<sup>2</sup>/pulse with 532nm photons and probed at 980nm which roughly corresponds to the center of a spectrally broad photoinduced absorption band.

## Simulation parameters

The donor/acceptor interface is characterized by the lattice constant  $a$ , the molecular dimension parameter  $b$  (in the Coulomb potential expression), the interaction energies between sites  $J_{DA}$  and  $J_A$ , the donor site excitation energy  $\epsilon_D$ , the disorder  $\sigma$  and the system – bath coupling strength  $\lambda$ . In addition, the overall size of the lattice could be variable due to the complexity of interfacial domains at hierarchical morphologies of the blend. We assume that differences in morphologies are mostly reflected by a variation of couplings between the acceptor sites. Simulation parameters were chosen as those typical for polymer-PCBM systems: driving force  $\Delta E = 0.1$  eV for P3TI:PC<sub>71</sub>BM, CT exciton binding energy  $\epsilon_{CT} = -0.27$  eV, and the energetic disorder  $\sigma$

of PCBM was set equal to  $\sigma = 75$  meV, corresponding to the experimentally determined value in [3s] and  $J_{DA}$  is set equal to 12.5 meV leading to an electron transfer time of 100 fs, in agreement with experimental transient absorption data in Figure 2s. The lattice constant is equal to 1 nm. However, we point out that absolute values of these parameters, such as for example the energetic disorder of the PCBM phase, are model dependent. In order to determine the sensitivity of our simulations to different parameters, we have calculated the dynamics of the system by varying the parameters in the vicinity of the values given. For this investigation we used a smaller acceptor lattice of  $8 \times 8 \times 8$  sites. Results are presented in Figs. 3s – 6s. We find that the most important parameter governing the coherent dynamics ( $< 500$  fs) of the electron is the inter-acceptor coupling  $J_A$ . While the dynamics at later times ( $> 500$  fs) somewhat differ, they remain qualitatively the same within the range of parameter values reported by other studies. Hence, in later analysis we have kept all of the parameters fixed to those outlined above, except for the inter-acceptor coupling  $J_A$ , which was varied.

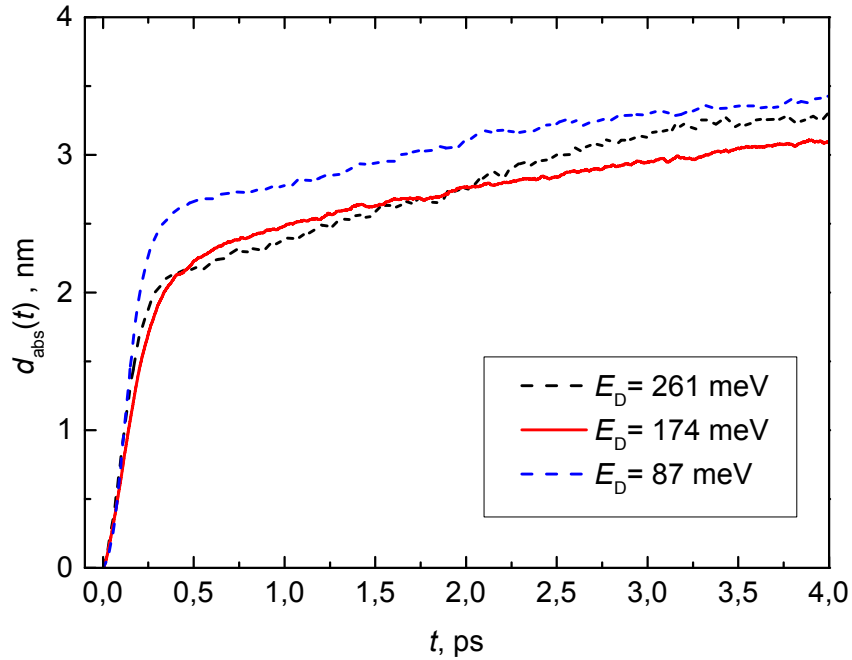

**Figure 3s.** Absolute charge separation distance  $d_{\text{abs}}(t)$  for different values of donor excitation energy  $\varepsilon_D$ .

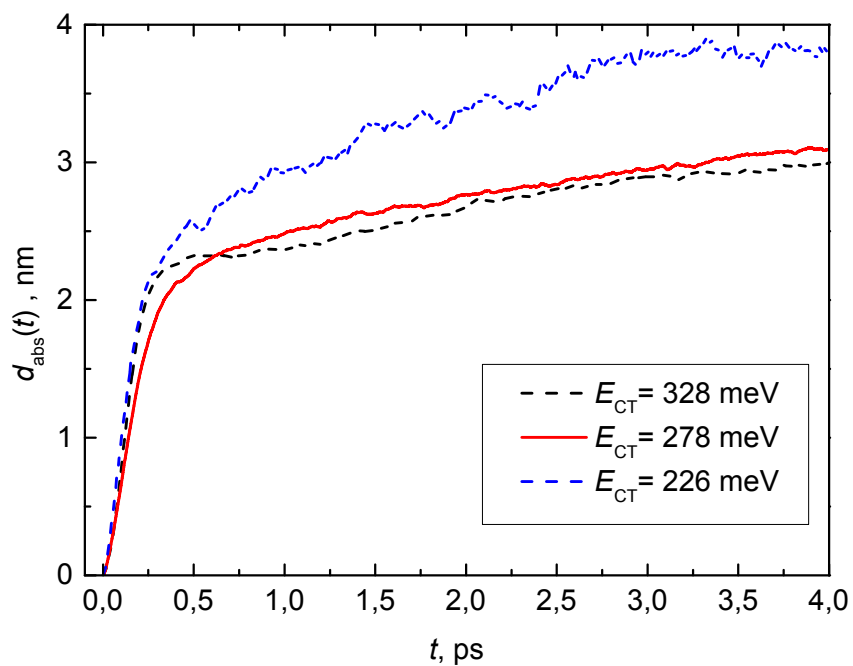

**Figure 4s.** Absolute charge separation distance  $d_{\text{abs}}(t)$  for different values of CT state energy  $\varepsilon_{\text{CT}}$ .

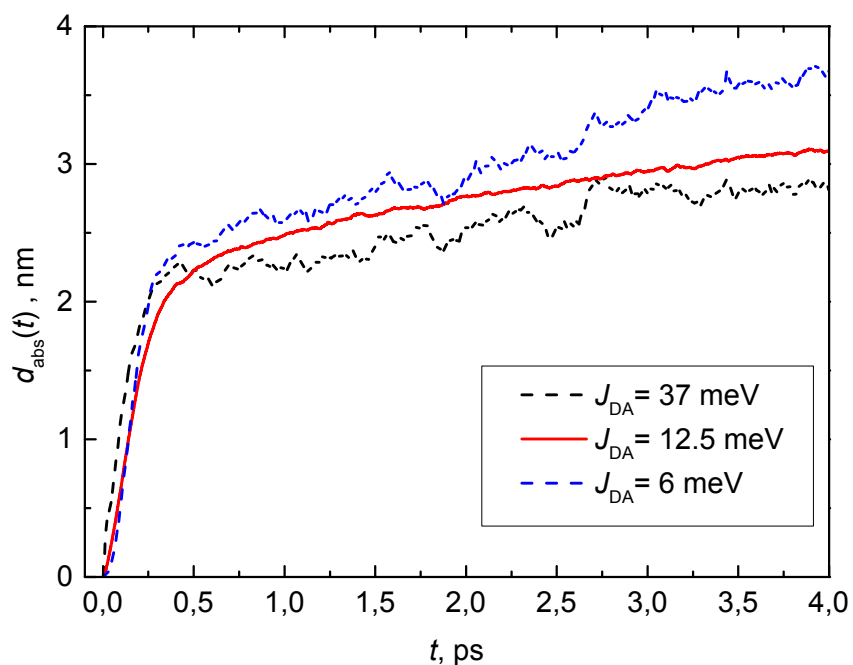

**Figure 5s.** Absolute charge separation distance  $d_{\text{abs}}(t)$  for different values of donor-acceptor interaction energy  $J_{\text{DA}}$ .

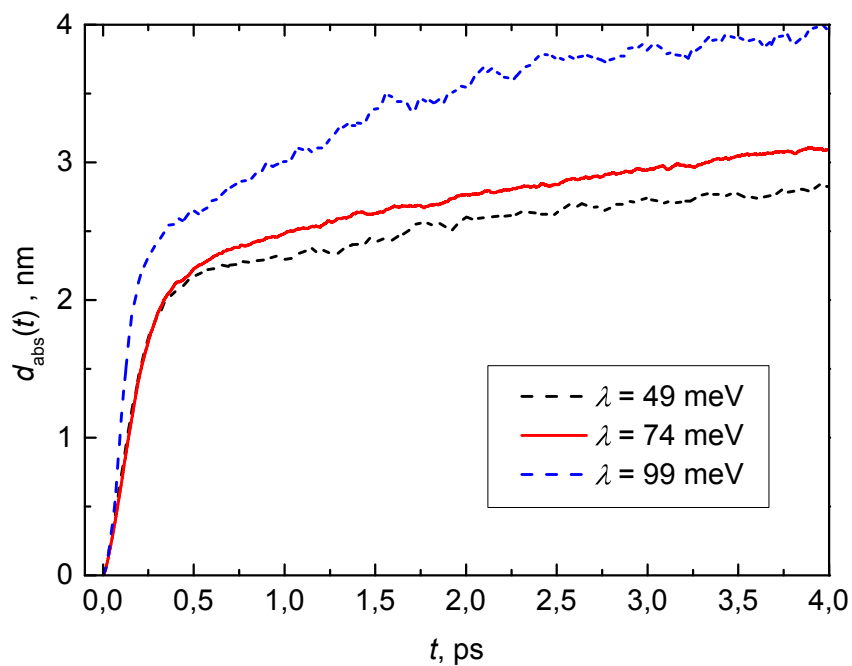

**Figure 6s.** Absolute charge separation distance  $d_{\text{abs}}(t)$  for different values of system-bath interaction energy  $\lambda$ .

References:

[1s] Vithanage, D. A., et al. Visualizing charge separation in bulk heterojunction organic solar cells. *Nat. Commun.* **4**, 2334 (2013).

[2s] Pranculis, V., et al. Charge carrier generation and transport in different stoichiometry APFO3:PC61BM solar cells. *J. Am. Chem. Soc.* **136**, 11331-11338 (2014).

[3s] Mihailetschi, V. D., et al. Electron transport in a methanofullerene. *Adv. Funct. Mater.* **13**, 43-46 (2003).
